# Supplementary material for: Efficacy of Lycium barbarum polysaccharide in adolescents with subthreshold depression: interim analysis of a randomized controlled study
Source: PubMed Central journal article supplement — Neural Regen Res. 2021 Dec 10;17(7):1582–7. doi: 10.4103/1673-5374.330618 (PMC8771081; doi:10.4103/1673-5374.330618), 2021-12-10
Supplement: NRR-17-1582_Suppl1.pdf [file NRR-17-1582_Suppl1.pdf]

广州医科大学附属第五医院伦理委员会  
伦理审批报告

审批日期：2019年4月3日

|                                                                                                                                                                                                                                      |                                                                                                                                                                        |                                                                                                      |                 |
|--------------------------------------------------------------------------------------------------------------------------------------------------------------------------------------------------------------------------------------|------------------------------------------------------------------------------------------------------------------------------------------------------------------------|------------------------------------------------------------------------------------------------------|-----------------|
| 申办单位/研制单位：广州医科大学苏国辉院士工作站                                                                                                                                                                                                             |                                                                                                                                                                        |                                                                                                      |                 |
| 临床研究方案编号及版本：V001                                                                                                                                                                                                                     |                                                                                                                                                                        | 药品注册批件号：-                                                                                            |                 |
| 版本日期：2019年1月7日                                                                                                                                                                                                                       |                                                                                                                                                                        |                                                                                                      |                 |
| 研究组长单位：广州医科大学附属第五医院                                                                                                                                                                                                                  |                                                                                                                                                                        |                                                                                                      |                 |
| 本院临床研究负责人与科室：                                                                                                                                                                                                                        |                                                                                                                                                                        | 莫煊 心理（精神）科                                                                                           | 职称：副主任医师        |
| 临床研究题目：枸杞多糖治疗阈下抑郁人群的疗效评价研究                                                                                                                                                                                                           |                                                                                                                                                                        |                                                                                                      |                 |
| 报送材料                                                                                                                                                                                                                                 | 药品注册批件                                                                                                                                                                 | 有 <input type="checkbox"/> 无 <input checked="" type="checkbox"/>                                     | 审查内容            |
|                                                                                                                                                                                                                                      | 临床研究方案                                                                                                                                                                 | 有 <input checked="" type="checkbox"/> 无 <input type="checkbox"/>                                     |                 |
|                                                                                                                                                                                                                                      | 研究者手册                                                                                                                                                                  | 有 <input type="checkbox"/> 无 <input checked="" type="checkbox"/>                                     |                 |
|                                                                                                                                                                                                                                      | 患者知情同意书                                                                                                                                                                | 有 <input checked="" type="checkbox"/> 无 <input type="checkbox"/>                                     |                 |
|                                                                                                                                                                                                                                      | 药检合格报告                                                                                                                                                                 | 有 <input type="checkbox"/> 无 <input checked="" type="checkbox"/>                                     |                 |
|                                                                                                                                                                                                                                      | 病例报告表                                                                                                                                                                  | 有 <input checked="" type="checkbox"/> 无 <input type="checkbox"/>                                     |                 |
|                                                                                                                                                                                                                                      | 附件                                                                                                                                                                     | 有 <input checked="" type="checkbox"/> 无 <input type="checkbox"/>                                     |                 |
| 申办者资质证明                                                                                                                                                                                                                              |                                                                                                                                                                        | 符合要求 <input checked="" type="checkbox"/> 不符合要求 <input type="checkbox"/>                              |                 |
| 获取知情同意书的办法                                                                                                                                                                                                                           |                                                                                                                                                                        | 适当 <input checked="" type="checkbox"/> 不适当 <input type="checkbox"/>                                  |                 |
| 对试验方案意见                                                                                                                                                                                                                              |                                                                                                                                                                        | 接受 <input checked="" type="checkbox"/> 不接受 <input type="checkbox"/>                                  |                 |
| 审查途径                                                                                                                                                                                                                                 |                                                                                                                                                                        | 常规审查 <input checked="" type="checkbox"/> 快速审查 <input type="checkbox"/> 跟踪审查 <input type="checkbox"/> |                 |
| 其他：<br>1. 广州医科大学附属第五医院伦理委员会初审申请表；<br>2. 枸杞多糖生产许可证；<br>3. 枸杞多糖生产许可证品种明细表；<br>4. 糖皮质激素生产批号证明；<br>5. 完整生产批号证明；<br>6. 研究方案（V001,2019-1-7）；<br>7. 知情同意书（V001,2019-1-7）；<br>8. 主要研究者个人简历；<br>9. 研究人员名单；<br>10. 病例报告表（V001,2019-1-7）。       |                                                                                                                                                                        |                                                                                                      |                 |
| 伦理委员会表决结果汇总                                                                                                                                                                                                                          |                                                                                                                                                                        |                                                                                                      |                 |
| 出席委员                                                                                                                                                                                                                                 | 应到委员人数：9人                                                                                                                                                              | 实到委员人数：9人                                                                                            | 弃权委员人数：0人       |
| 投票结果                                                                                                                                                                                                                                 | 同意 9票                                                                                                                                                                  | 不同意 0票                                                                                               | 作必要修改后<br>同意 0票 |
|                                                                                                                                                                                                                                      |                                                                                                                                                                        |                                                                                                      | 作必要修改后<br>重审 0票 |
|                                                                                                                                                                                                                                      |                                                                                                                                                                        |                                                                                                      | 中止或暂停<br>试验 0票  |
|                                                                                                                                                                                                                                      |                                                                                                                                                                        |                                                                                                      | 回避 0票           |
| 结论                                                                                                                                                                                                                                   | 同意 <input checked="" type="checkbox"/> 不同意 <input type="checkbox"/> 作必要修改后同意 <input type="checkbox"/> 作必要修改后重审 <input type="checkbox"/> 终止或暂停 <input type="checkbox"/> |                                                                                                      |                 |
| 伦理委员会审批意见：<br>广州医科大学附属第五医院伦理委员会于2019年4月3日会议审查了“枸杞多糖治疗阈下抑郁人群的疗效评价研究”项目的报送资料。经委员投票表决，同意该项目于2019年4月8日起在我院心理（精神）科开展，并进行定期跟踪评审。<br><br>跟踪审查频率： <input checked="" type="checkbox"/> 半年； <input type="checkbox"/> 一年 下次递交审查报告日期为：2019年9月7日前 |                                                                                                                                                                        |                                                                                                      |                 |
| 伦理委员会主任/副主任签名：                                                                                                                                                                                                                       |                                                                                                                                                                        | 日期：2019年4月4日                                                                                         |                 |
| 伦理委员会公章：                                                                                                                                                                                                                             |                                                                                                                                                                        |                                                                                                      |                 |
