# Supplementary material for: Efficacy of Lycium barbarum polysaccharide in adolescents with subthreshold depression: interim analysis of a randomized controlled study
Source: PubMed Central journal article supplement — Neural Regen Res. 2021 Dec 10;17(7):1582–7. doi: 10.4103/1673-5374.330618 (PMC8771081; doi:10.4103/1673-5374.330618), 2021-12-10
Supplement: NRR-17-1582_Suppl2.pdf [file NRR-17-1582_Suppl2.pdf]

## 【项目】枸杞多糖治疗阈下抑郁人群的疗效评价研究

### 知情同意书

#### 【项目介绍】

枸杞的活性成分枸杞多糖具有神经保护作用，是一种具有药食同源的食品。研究提示，枸杞多糖可能通过改善突触可塑性的机制从而改善抑郁、焦虑和认知功能等。目前仍未有枸杞多糖治疗阈下抑郁人群（亚健康人群）的临床试验报告。此项目将对阈下抑郁人群使用枸杞多糖的疗效进行研究，从而进一步了解枸杞多糖对阈下抑郁人群的疗效，使阈下抑郁人群得到有效治疗，减少阈下抑郁人群发展成抑郁症患者的发生率，减轻患者、家人及社会的痛苦和负担。

项目得到广州医科大学附属第五医院伦理委员会批准（伦理批号：L2019-08），并在美国ClinicalTrials.gov临床注册网站登记（编号：NCT04032795）。

广州医科大学附属第五医院是一所以康复医学技术和微创外科技术为品牌特色，集医疗、教学、科研与预防保健为一体的，广州东部最大的、唯一一家独立法人建制的市属三级综合公立医院，是黄埔区首家超千床的区域性中心医院。

#### 【研究目的】

此项目将对阈下抑郁人群使用枸杞多糖的疗效进行研究，从而进一步了解枸杞多糖对阈下抑郁人群的疗效，使阈下抑郁人群得到有效治疗，减少阈下抑郁人群发展成抑郁症患者的发生率，减轻患者、家人及社会的痛苦和负担。

#### 【参与原则】

您参与本研究完全遵循自愿原则。

#### 【试验过程】

参与研究被试被1:1随机分配到干预组（枸杞多糖）或安慰剂组，每天服用一片枸杞多糖片或安慰剂片，共6周。被试分别在基线、治疗后4周、6周时完成临床评定（包括自评和他评问卷）、睡眠指数评定、和抽血送实验室检验。

#### 【受益与风险】

参与本研究您可以得到下列益处：（1）免费进行精神状态的评定和得到医生专业的指导意见；（2）免费进行汉密顿抑郁量表（HAMD）/贝克抑郁自评量表（BDI）等量表评定；（3）免费进行匹茨堡睡眠指数（PSQI）评定；（4）免费抽血检测脑源性神经营养因子（BDNF）、甘油三酯、总胆固醇等的改变。

风险：（1）作为受试者，抽血过程中可能存在感染等相关风险，但概率极低，我们将

安排专业医护人员为您进行抽血，整个过程严格按无菌操作要求执行，会做好相关保护措施及应急方案。

(2) 如果您参加本研究，希望您能按医生的医嘱完成相关检查。在研究过程中您可以中途退出，我们不会因您退出研究而影响对您或您的家人的治疗。

**【保密原则】**

您参与本研究的所有个人资料和观察记录均属保密，仅供本研究使用。试验期间，您可随时了解有关的信息资料，如在试验中需要咨询有关问题时，可与研究医师联系。

**我已认真阅读该知情同意书，研究人员已向我做了详尽说明并解答了我的相关问题，我已充分知晓以上内容，同意参加研究。**

受试者：\_\_\_\_\_ 日期：\_\_\_\_\_

法定监护人：\_\_\_\_\_ 与受试者关系：\_\_\_\_\_

联系电话：\_\_\_\_\_ 日期：\_\_\_\_\_

研究医生：\_\_\_\_\_ 联系电话：\_\_\_\_\_

日期：\_\_\_\_\_
